# Supplementary material for: Anti-Inflammatory and Pro-Differentiating Properties of the Aryl Hydrocarbon Receptor Ligands NPD-0614-13 and NPD-0614-24: Potential Therapeutic Benefits in Psoriasis
Source: MDPI journal article supplement (doi:10.3390/ijms22147501), 2021-07-13
Supplement: s1 [file s1]

**Supplementary Materials:**

| Gene                           |         | Oligonucleotide sequences (5'-3') | Amplicon size | Accession number |
|--------------------------------|---------|-----------------------------------|---------------|------------------|
| <b>AhR</b>                     | Forward | ATCACCTACGCCAGTCGCAAG             | 137 bp        | NM_001621.4      |
|                                | Reverse | AGGCTAGCCAAACGGTCCAAC             |               |                  |
| <b>BD-2 (beta-defensin2)</b>   | Forward | GATGCCTCTTCCAGGTGTTTT             | 75 bp         | NM_001205266.1   |
|                                | Reverse | GGATGACATATGGCTCCACTCTT           |               |                  |
| <b>CASP14</b>                  | Forward | ACATCGCCTACCGACATGATC             | 110 bp        | NM_012114.3      |
|                                | Reverse | CCGGGTCACCTCTGTCAGAA              |               |                  |
| <b>CYP1A1</b>                  | Forward | CTGGAGACCTTCCGACACTCTT            | 84 bp         | NM_000499.5      |
|                                | Reverse | GTAAAAGCCTTTCAAACTTGTCCTCT        |               |                  |
| <b>CYP1B1</b>                  | Forward | AACGTACCGCCACTATCAC               | 139 bp        | NM_000104.3      |
|                                | Reverse | CCACGACCTGATCCAATTCT              |               |                  |
| <b>FLG (Filaggrin)</b>         | Forward | GAAGACAAGGATCGCACCAG              | 76 bp         | NM_002016.2      |
|                                | Reverse | ATGGTGCTCTGACCTCTTG               |               |                  |
| <b>GAPDH</b>                   | Forward | TGCACCACCAACTGCTTAGC              | 198 bp        | NM_001289746     |
|                                | Reverse | GGCATGGACTGTGGTCATGAG             |               |                  |
| <b>IL-1<math>\alpha</math></b> | Forward | CGCCAATGACTCAGAGGAAGA             | 120 bp        | NM_000575        |
|                                | Reverse | AGGGCGTCATTCAGGATGAA              |               |                  |
| <b>IL-1<math>\beta</math></b>  | Forward | CTGAGCTCGCCAGTGAAATG              | 77 bp         | NM_000576.2      |
|                                | Reverse | TTTAGGGCCATCAGCTTCAAA             |               |                  |
| <b>IL-6</b>                    | Forward | AGCCACTCACCTCTTCAGAACG            | 141 bp        | NM_000600        |
|                                | Reverse | GGTTCAGGTGTTTTCTGCCAG             |               |                  |
| <b>IL-8</b>                    | Forward | CTTGGCAGCCTTCCTGATTTC             | 168 bp        | NM_000584        |
|                                | Reverse | TTCGTGTGTGGCGCAGTGTC              |               |                  |
| <b>INV (Involucrin)</b>        | Forward | ACCCATCAGGAGCAAATGAAA             | 67 bp         | NM_005547.4      |
|                                | Reverse | GCTCGACAGGCACCTTCTGGC             |               |                  |
| <b>NOQ1</b>                    | Forward | GGATTGGACCGAGCTGGAA               | 140 bp        | NM_000903.2      |
|                                | Reverse | AATTGCAGTGAAGATGAAGCAAC           |               |                  |
| <b>NRF-2</b>                   | Forward | CTTGGCCTCAGTGATTCTGAAGTG          | 124 bp        | NM_001313903     |
|                                | Reverse | CCTGAGATGGTGACAAGGTTGTA           |               |                  |
| <b>S100A7</b>                  | Forward | CTTCTACTCGTGACGCTTCC              | 205 bp        | NM_002963.4      |
|                                | Reverse | AATTGTGCCCTTTTGTCA                |               |                  |

**Supplemental Table S1.** Primers used for the Real time RT-PCR analysis

(a)

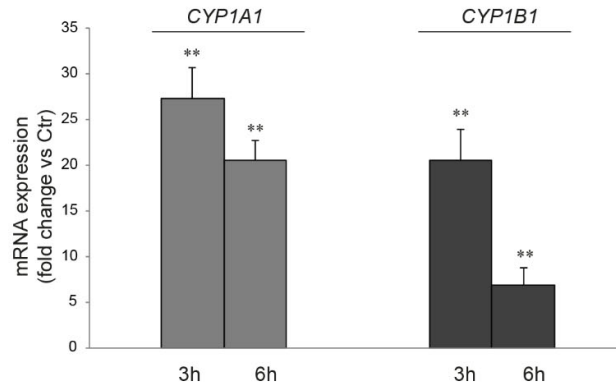

(b)

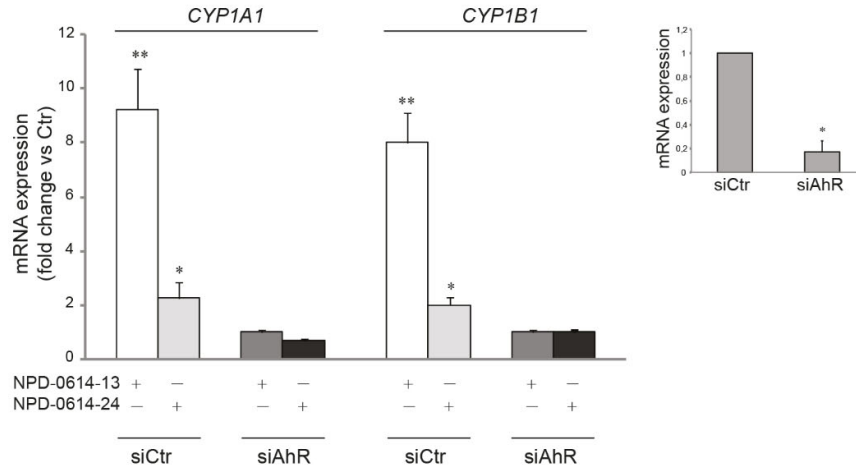

Figure S1

**Figure S1. (a)** Activation of AhR signaling in response to FICZ in NHKs. Quantitative real time PCR analysis of CYP1A1 and CYP1B1 in NHKs treated with FICZ (100 nM) for 3-6 h. All mRNA values were normalized against the expression of GAPDH and were expressed relative to untreated control cells (\* $p < 0.05$ , \*\* $p < 0.01$  vs untreated control). **(b)** Activation of AhR signaling in response to NPD-0614-13 and NPD-0614-24 in NHKs. Quantitative real time PCR analysis of CYP1A1 and CYP1B1 in NHKs transfected with siRNA specific for AhR (siAhR) or siCtr and stimulated with NPD-0614-13 and NPD-0614-24 (25 μM) for 24 h. Data represent the mean  $\pm$  SD of three independent experiments. Results are expressed as the fold change respect to untreated control cells (\* $p < 0.05$ , \*\* $p < 0.01$  vs untreated control).

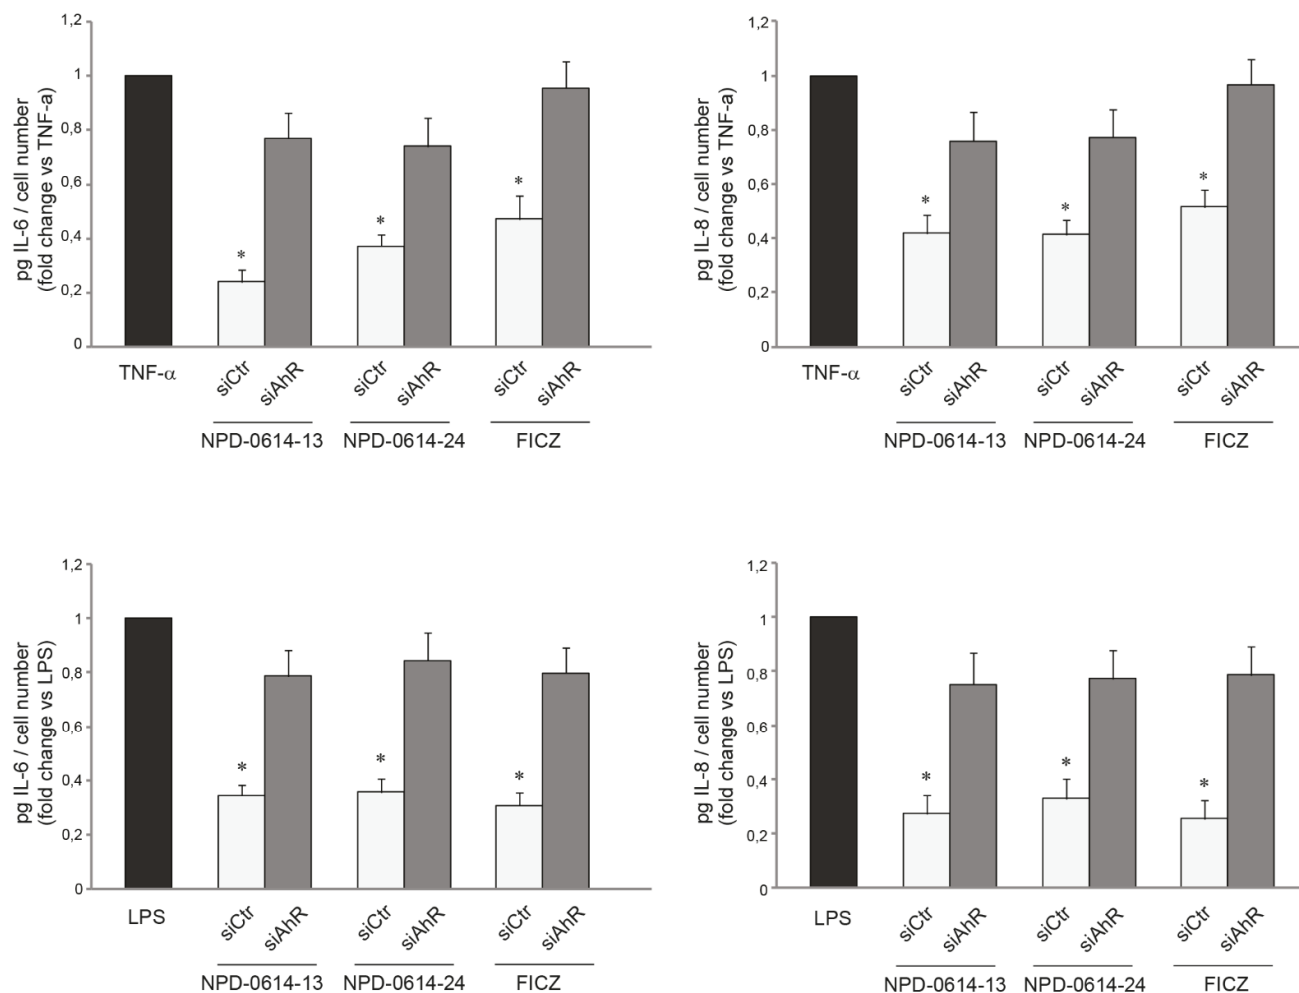

Figure S2

**Figure S2.** The anti-inflammatory effect of NPD-0614-13 and NPD-0614-24 required AhR activation. IL-6 and IL-8 quantitation by ELISA in NHKs transfected with AhR siRNA or siCtrl and treated with TNF- $\alpha$  (20 ng/ml) or LPS (10  $\mu$ g/ml) in the presence or absence of NPD-0614-13, NPD-0614-24 (25  $\mu$ M) and FICZ (100 nM) for 24 h. Data represent the mean  $\pm$  SD of three independent experiments. Results are expressed as the fold change respect to untreated control cells (\*p < 0.05, \*\*p < 0.01 vs untreated control).
